# Supplementary material for: Clinical Characteristics and Outcomes of Patients Hospitalized with Epidermolysis Bullosa: A Retrospective Population-Based Observational Study in Spain (2016–2021)
Source: MDPI journal article supplement (doi:10.3390/biomedicines11092584), 2023-09-20
Supplement: s1 [file s1]

**Supplementary Table S2.** Procedures conducted during the hospitalization identified in this investigation with their corresponding ICD-10-CM codes.

| Procedures                                                                              | ICD-code 10                                                                                                                                                                                                                                                                           |
|-----------------------------------------------------------------------------------------|---------------------------------------------------------------------------------------------------------------------------------------------------------------------------------------------------------------------------------------------------------------------------------------|
| Dilation of Esophagus                                                                   | 0D718ZZ, 0D728ZZ, 0D738DZ, 0D757ZZ, 0D758DZ, 0D758ZZ                                                                                                                                                                                                                                  |
| Percutaneous Endoscopic Gastrostomy Surgery                                             | 0DH60UZ, 0DH63UZ, 0DH64UZ, 0DH67UZ, 0DH673Z, 0DH68UZ, 0DHA7UZ, 0DHA3UZ                                                                                                                                                                                                                |
| Excision or Extraction of Skin, External Approach                                       | 0HB0XZZ, 0HB1XZZ, 0HB4XZX, 0HB5XZX, 0HB6XZZ, 0HB7XZX, 0HB8XZX, 0HB8XZZ, 0HBBXZZ, 0HBCXZX, 0HBDXZX, 0HBFXZX, 0HBFXZZ, 0HBGXZZ, 0HBHXZZ, 0HBjXZX, 0HBKXZX, 0HBKXZZ, 0HBLXZX, 0HBLXZZ, 0HBMXZX, 0HBMXZZ, 0HBNXZZ, 0HCLXZZ, 0HDFXZZ, 0HDGXZZ, 0HDNXZZ, 0HJPXZZ, 0HNFXZZ, 0HNGXZZ, 0HQFXZZ |
| Replacement of Skin with Nonautologous/ Autologous Tissue Substitute, External Approach | 0HR6XK4, 0HREFX73, 0HREFX74, 0HRGX73, 0HRGX74, 0HRKXJ4, 0HRLX73, 0HRLX74, 0HRMX74, 0HRMXJZ, 0HRNX74, 0HRNX74, 0HR5XJ4, 0HRCX74, 0HREX74, 0HRKX73, 0HRKX74, 0HRLX74, 0HR5X74, 0HR7XJ4, 0HREFXJZ, 0HREFXK3, 0HRKX74, 0HRBXJ4, 0HRGXJ4, 0HRLX74, 0HRGXJZ, 0HRHXJ4, 0HRMXK3               |
| Extraction and Delivery of Products of Conception                                       | 10D00Z1, 10D07Z6, 10D17ZZ, 10E0XZZ                                                                                                                                                                                                                                                    |
| Transfusion, Percutaneous Approach                                                      | 30233N1, 30233R1, 30233Y2, 30243N1, 30243Y2, 30233K1, 30233P1, 30233R1, 30233S1, 30243N1, 30243J1, 30243R1, 30233L1                                                                                                                                                                   |
| Skin care treatments and procedures                                                     | F08F5BZ, F08G5BZ, F08G5ZZ, F08H5BZ, F08H5ZZ, F08M5YZ, F08F5ZZ, F08H5FZ, F08K5ZZ, F08D5BZ, F08K5CZ, F08M5BZ                                                                                                                                                                            |
