# Supplementary material for: Clinical Characteristics and Outcomes of Patients Hospitalized with Epidermolysis Bullosa: A Retrospective Population-Based Observational Study in Spain (2016–2021)
Source: MDPI journal article supplement (doi:10.3390/biomedicines11092584), 2023-09-20
Supplement: s1 [file s1]

**Supplementary Table S1.** Specific comorbidities and malignant neoplasm types identified in this investigation with their corresponding ICD-10-CM codes.

| DIAGNOSIS                                                           | ICD-10-CM Codes                                                               |
|---------------------------------------------------------------------|-------------------------------------------------------------------------------|
| Digestive system                                                    | K00-K95, Q39.3, 8, Q40.0, Q61.2, Z43.1, Z 43.2                                |
| Respiratory system                                                  | J00-J99                                                                       |
| Infectious and parasitic                                            | A00-B99, G04.90, O23.01, L00-L08                                              |
| Injury, poisoning and certain other consequences of external causes | S00 -T88                                                                      |
| Musculoskeletal system                                              | M00-M99                                                                       |
| Squamous cell carcinoma                                             | C44.329, C44.42, C44.529, C44.622, C44.629, C44.721, C44.722, C44.729, D04.62 |
| Basal cell carcinoma                                                | C44.91                                                                        |
| Secondary malignant neoplasm of skin                                | C79.2                                                                         |
| Breast cancer                                                       | C50.011, C50.912, D05.11                                                      |
| Prostate cancer                                                     | C61                                                                           |
| Hematologic malignancies                                            | C91.02, C92.10, D45                                                           |
| Colorectal cancer                                                   | C18.7, C20                                                                    |
| Secondary liver cancer                                              | C78.6, C78.7                                                                  |
| Secondary endocrine cancer                                          | C79.70, C79.71, C79.72, C7A.8                                                 |
| Secondary bone cancer                                               | C79.51                                                                        |
| Secondary lung cancer                                               | C78.00, C78.01, C78.02                                                        |
| Secondary lymphatic system cancer                                   | C77.1, C77.2, C77.3, C77.4, C77.9                                             |
| Remaining cancers not included in the previous ones                 | C55, C71.0, C79.31, C90.00, D46.A, D47.2, C46.0, C79.89, C80.1                |
