# Supplementary material for: Clinical Characteristics and Outcomes of Patients Hospitalized with Epidermolysis Bullosa: A Retrospective Population-Based Observational Study in Spain (2016–2021)
Source: MDPI journal article supplement (doi:10.3390/biomedicines11092584), 2023-09-20
Supplement: s1 [file s1]

**Supplementary Table S3.** Distribution of epidermolysis bullosa (EB) subtypes according to main study variables

| Epidermolysis bullosa subtypes |             | EBS       | JEB     | DEB       | Other EB  | Nonspecific EB |
|--------------------------------|-------------|-----------|---------|-----------|-----------|----------------|
| Individuals patients, No. (%)  |             | 30 (8.6)  | 5 (1.4) | 92 (26.5) | 35 (10.1) | 185 (53.3)     |
| Age groups, No. (%)            | 0-1 years   | 13 (43.3) | 4 (80)  | 16 (17.4) | 3 (8.6)   | 49 (26.5)      |
|                                | 2-17 years  | 3 (10)    | 0 (0)   | 41 (44.6) | 1 (2.9)   | 40 (21.6)      |
|                                | 18-50 years | 3 (10)    | 0 (0)   | 32 (34.8) | 12 (34.3) | 43 (23.2)      |
|                                | >50 years   | 11 (36.7) | 1 (20)  | 3 (3.3)   | 19 (54.3) | 53 (28.6)      |
| Sex, No. (%)                   | Men         | 14 (46.6) | 2 (40)  | 53 (57.6) | 20 (57.1) | 98 (53)        |
|                                | Women       | 16 (53.3) | 3 (60)  | 39 (42.4) | 15 (42.9) | 87 (47)        |
| In hospital mortality, No. (%) |             | 3 (10)    | 1 (20)  | 7 (7.6)   | 5(14.3)   | 14 (7.6)       |

EBS epidermolysis bullosa simplex. JEB junctional epidermolysis bullosa. DEB dystrophic epidermolysis bullosa
